# Supplementary material for: Body-to-brain Insulin and Notch signaling regulates memory through neuronal CREB activity
Source: Research Square preprint supplement (doi:10.21203/rs.3.rs-4486119/v1), 2024-06-17
Supplement: Supplementary file 2 [file 91735285e595ba2b7e3678b4.xlsx]

## Sheet: Figure 1
Figure 1A						1B						1C						1D						1E						1F
strain	CI at naïve	mean CI of naive	CI at T0	LI at T0		strain	CI at naïve	mean CI of naive	CI at T0	LI at T0		strain	CI at naïve	mean CI of naive	CI at T0	LI at T0		strain	CI at naïve	mean CI of naive	CI at T0	LI at T0		strain	CI at naïve	mean CI of naive	CI at T0	LI at T0		strain	CI at naïve	mean CI of naive	CI at T0	LI at T0
daf-2	0.58824	0.539326	0.98969	0.450364		daf-2 auxin	0.71287	0.715612	1	0.284388		daf-2 auxin	0.55556	0.594168	0.9562	0.362032		daf-2 auxin	0.32653	0.373418	0.84956	0.476142		daf-2 auxin	0.39474	0.327502	0.98319	0.655688		daf-2 auxin	0.71875	0.599648	0.96552	0.365872
daf-2	0.48598		0.9801	0.440774		daf-2 auxin	0.63964		0.98347	0.267858		daf-2 auxin	0.47917		0.96117	0.367003		daf-2 auxin	0.65217		0.93913	0.565712		daf-2 auxin	0.24176		0.94545	0.617948		daf-2 auxin	0.69767		0.99115	0.391502
daf-2	0.45361		0.975	0.435674		daf-2 auxin	0.69318		0.93798	0.222368		daf-2 auxin	0.74194		0.93506	0.340892		daf-2 auxin	0.21839		0.96939	0.595972		daf-2 auxin	0.33333		0.97656	0.649058		daf-2 auxin	0.56522		0.96262	0.362972
daf-2	0.7732		0.97163	0.432304		daf-2 auxin	0.72535		1	0.284388		daf-2 auxin	0.6		0.97115	0.376982		daf-2 auxin	0.41667		0.93458	0.561162		daf-2 auxin	0.375		0.9902	0.662698		daf-2 auxin	0.58571		0.9863	0.386652
daf-2	0.3956		0.91498	0.375654		daf-2 auxin	0.80702					daf-2 auxin			0.98425	0.390082		daf-2 auxin	0.25333		1	0.626582		daf-2 auxin	0.29268		0.97059	0.643088		daf-2 auxin	0.43089		0.9902	0.390552
N2	0.51759	0.455782	0.98182	0.526038		daf-2	0.43243	0.63781	1	0.36219		daf-2	0.56	0.55533	0.96629	0.41096		daf-2	0.53901	0.43374	1	0.56626		daf-2	0.3913	0.349344	1	0.650656		daf-2	0.42254	0.511222	0.97059	0.459368
N2	0.51121		0.96313	0.507348		daf-2	0.55932		0.98693	0.34912		daf-2	0.64789		0.92208	0.36675		daf-2	0.40323		0.97938	0.54564		daf-2	0.23404		0.99254	0.643196		daf-2	0.44828		0.97778	0.466558
N2	0.31841		0.97633	0.520548		daf-2	0.89189		0.98131	0.3435		daf-2	0.39785		0.94068	0.38535		daf-2	0.40659		0.77869	0.34495		daf-2	0.43284		1	0.650656		daf-2	0.52439		1	0.488778
N2	0.54872		0.98214	0.526358		daf-2	0.52459		0.94083	0.30302		daf-2	0.56164		0.95804	0.40271		daf-2	0.39394		0.93814	0.5044		daf-2	0.36111		1	0.650656		daf-2	0.61972		0.9589	0.447678
N2	0.38298		0.98907	0.533288		daf-2	0.78082		1	0.36219		daf-2	0.60927		0.98305	0.42772		daf-2	0.42593		0.98925	0.55551		daf-2	0.32743		1	0.650656		daf-2	0.54118		1	0.488778
						N2 auxin	0.17949	0.225676	0.95808	0.732404		N2 auxin	0.21053	0.123866	0.95429	0.830424		N2 auxin	0	-0.0533228	1	1.05332		N2 auxin	-0.14414	-0.178472	1	1.17847		N2 auxin	0.014085	0.250205	0.94643	0.696225
						N2 auxin	0.20339		0.99435	0.768674		N2 auxin	0.013333		0.98901	0.865144		N2 auxin	-0.14545		0.95798	1.0113		N2 auxin	-0.20513		0.9823	1.16077		N2 auxin	0.37705		0.93548	0.685275
						N2 auxin	0.22368		0.99123	0.765554		N2 auxin	0.037037		0.97191	0.848044		N2 auxin	0		0.97248	1.0258		N2 auxin	-0.16935		0.99265	1.17112		N2 auxin	0.073529		0.89286	0.642655
						N2 auxin	0.43182		1	0.774324		N2 auxin	0.097561		0.99471	0.870844		N2 auxin	-0.028571		0.94444	0.997763		N2 auxin	-0.17143		0.91743	1.0959		N2 auxin	0.30303		0.99065	0.740445
						N2 auxin	0.09		0.96067	0.734994		N2 auxin	0.26087		0.92899	0.805124		N2 auxin	-0.092593		0.98913	1.04245		N2 auxin	-0.20231		0.93233	1.1108		N2 auxin	0.48333		0.96899	0.718785
						N2	0.15873	0.328924	0.99091	0.661986		N2	0.31016	0.290426	0.95312	0.662694		N2	0.13287	0.071511	0.94326	0.871749		N2	-0.017857	-0.0544438	0.98473	1.03917		N2	0.25	0.267616	0.93443	0.666814
						N2	0.31646		0.93069	0.601766		N2	0.26923		0.87234	0.581914		N2	0.10667		0.9802	0.908689		N2	0.028249		0.9816	1.03604		N2	0.3301		0.98347	0.715854
						N2	0.45455		0.97024	0.641316		N2	0.32407		0.98658	0.696154		N2	-0.08871		1	0.928489		N2	-0.053435		0.98519	1.03963		N2	0.22556		0.89796	0.630344
						N2	0.36567		0.9875	0.658576		N2	0.25455		0.94366	0.653234		N2	0.13483		0.98462	0.913109		N2	-0.068376		0.99145	1.04589		N2	0.29104		0.91304	0.645424
						N2	0.34921		0.9569	0.627976		N2	0.29412		0.88971	0.599284		N2	0.071895		0.96703	0.895519		N2	-0.1608		0.97842	1.03286		N2	0.24138		0.95495	0.687334
						neuronal AID auxin	0.26316	0.091632	0.73333	0.641698		intestinal AID auxin	0.28889	0.203295	0.91892	0.744655		Gonadal sheath AID auxin	-0.2	-0.108957	1	1.10896		germline AID auxin	-0.15337	-0.169325	0.85217	1.0215		hypodermal AID auxin	0.34783	0.343312	0.98	0.636688
						neuronal AID auxin	0.125		0.92308	0.831448		intestinal AID auxin	0.04878		0.96026	0.785995		Gonadal sheath AID auxin	-0.076923		0.92308	1.03204		germline AID auxin	-0.30488		0.9469	1.11623		hypodermal AID auxin	0.44048		0.97386	0.630548
						neuronal AID auxin	0		0.8	0.708368		intestinal AID auxin	0.12857		0.94245	0.768185		Gonadal sheath AID auxin	-0.14286		0.97115	1.08011		germline AID auxin	-0.026786		0.67797	0.847295		hypodermal AID auxin	0.25806		0.98734	0.644028
						neuronal AID auxin	-0.25		0.74359	0.651958		intestinal AID auxin	0.34694		0.92523	0.750965		Gonadal sheath AID auxin	-0.125		0.875	0.983957		germline AID auxin	-0.19492		0.78641	0.955735		hypodermal AID auxin	0.29412		0.99231	0.648998
						neuronal AID auxin	0.32		0.84211	0.750478		intestinal AID auxin			0.9562	0.781935		Gonadal sheath AID auxin	0		0.96689	1.07585		germline AID auxin	-0.16667		0.85714	1.02647		hypodermal AID auxin	0.37607		0.95794	0.614628
						neuronal AID	-0.089286	-0.243351	0.74194	0.985291		intestinal AID	0.20833	0.162492	0.87097	0.708478		Gonadal sheath AID	-0.060241	-0.112273	0.96429	1.07656		germline	-0.13223	-0.108619	0.77174	0.880359		hypodermal AID	-0.41667	-0.275764	0.97222	1.24798
						neuronal AID	-0.26923		0.92771	1.17106		intestinal AID	0.2		0.90909	0.746598		Gonadal sheath AID	-0.11905		0.93548	1.04775		germline	-0.08		0.96939	1.07801		hypodermal AID	-0.23529		1	1.27576
						neuronal AID	-0.22642		0.63303	0.876381		intestinal AID	0.14151		0.85841	0.695918		Gonadal sheath AID	-0.095238		0.96774	1.08001		germline	-0.14124		0.89623	1.00485		hypodermal AID	-0.25263		0.92241	1.19817
						neuronal AID	-0.38182		0.76147	1.00482		intestinal AID	0.12121		0.91946	0.756968		Gonadal sheath AID	-0.24138		0.87302	0.985293		germline	-0.15909		0.82906	0.937679		hypodermal AID	-0.23256		0.9313	1.20706
						neuronal AID	-0.25		0.81356	1.05691		intestinal AID	0.14141		0.86331	0.700818		Gonadal sheath AID	-0.045455		0.79845	0.910723		germline	-0.030534		0.87879	0.987409		hypodermal AID	-0.24167		0.96875	1.24451

## Sheet: Figure 2
Figure 2F
strain	CI at naïve	mean CI of naive	CI at T0	LI at T0
unc-43 auixn	0.41935	0.46258	0.9322	0.46962
unc-43 auixn	0.26389		0.97753	0.51495
unc-43 auixn	0.62121		0.88333	0.42075
unc-43 auixn	0.61765		0.87302	0.41044
unc-43 auixn	0.3908		1	0.53742
unc-73 auxin	0.6	0.367378	0.98701	0.619632
unc-73 auxin	0.32099		0.97222	0.604842
unc-73 auxin	0.37963		0.90244	0.535062
unc-73 auxin	0.35165		0.8	0.432622
unc-73 auxin	0.18462		0.76667	0.399292
casy-1 auxin	0.2963	0.361956	1	0.638044
casy-1 auxin	0.36364		0.76364	0.401684
casy-1 auxin	0.28261		0.96721	0.605254
casy-1 auxin	0.35294		0.95556	0.593604
casy-1 auxin	0.51429		1	0.638044
control auxin	0.29412	0.317892	0.92982	0.611928
control auxin	0.29787		0.94444	0.626548
control auxin	0.44048		0.83051	0.512618
control auxin	0.36111		0.93103	0.613138
control auxin	0.19588		0.94915	0.631258
control	0.25	0.440166	0.96226	0.522094
control	0.61111		0.98333	0.543164
control	0.48837		0.95833	0.518164
control	0.35135		0.98684	0.546674
control	0.5		1	0.559834

## Sheet: Figure 3
Figure 3A						3B						3C						3D						3E
strain	CI at naïve	mean CI of naive	CI at T0	LI at T0		strain	CI at naïve	mean CI of naive	CI at T0	LI at T0		strain	CI at naïve	mean CI of naive	CI at T0	LI at T0		strain	CI at naïve	mean CI of naive	CI at T0	LI at T0		strain	CI at naïve	mean CI of naive	CI at T0	LI at T0
crh-1	0.46009	0.418782	0.92754	0.508758		neuronal AID auxin	-0.071429	-0.0275536	0.81176	0.839314		hypodermal AID auxin	0.070064	0.206365	0.98765	0.781285		neuronal AID auxin with crh-1	0.50735	0.611596	0.98	0.368404		hypodermal AID auxin with crh-1	-0.047619	0.0493562	1	0.950644
crh-1	0.25191		0.93367	0.514888		neuronal AID auxin	-0.02439		0.91304	0.940594		hypodermal AID auxin	0.20455		0.84553	0.639165		neuronal AID auxin with crh-1	0.5873		0.97581	0.364214		hypodermal AID auxin with crh-1	0.018868		0.94898	0.899624
crh-1	0.46429		0.94872	0.529938		neuronal AID auxin	-0.125		0.90526	0.932814		hypodermal AID auxin	0.20321		0.87407	0.667705		neuronal AID auxin with crh-1	0.64467		0.96575	0.354154		hypodermal AID auxin with crh-1	0.10169		0.94	0.890644
crh-1	0.41549		0.96296	0.544178		neuronal AID auxin	-0.016949		0.56098	0.588534		hypodermal AID auxin	0.45		0.9918	0.785435		neuronal AID auxin with crh-1	0.58475		0.96629	0.354694		hypodermal AID auxin with crh-1	0.052632		0.92042	0.871064
crh-1	0.50213		0.94375	0.524968		neuronal AID auxin	0.1		0.67368	0.701234		hypodermal AID auxin	0.104		0.98095	0.774585		neuronal AID auxin with crh-1	0.73391		0.97917	0.367574		hypodermal AID auxin with crh-1	0.12121		0.89286	0.843504
daf-2;crh-1	0.54286	0.599046	0.93617	0.337124		neuronal AID	-0.17742	-0.112693	1	1.11269		hypodermal AID	-0.21678	-0.263872	0.97458	1.23845		neuronal AID with crh-1	0.64019	0.604082	1	0.395918		hypodermal AID with crh-1	-0.13978	-0.14262	0.70139	0.84401
daf-2;crh-1	0.61644		0.8629	0.263854		neuronal AID	-0.10638		0.68182	0.794513		hypodermal AID	-0.35455		0.90116	1.16503		neuronal AID with crh-1	0.64773		0.99187	0.387788		hypodermal AID with crh-1	-0.16667		0.79535	0.93797
daf-2;crh-1	0.6		0.84615	0.247104		neuronal AID	-0.023256		0.93103	1.04372		hypodermal AID	-0.3253		0.78261	1.04648		neuronal AID with crh-1	0.73481		0.9781	0.374018		hypodermal AID with crh-2	-0.47059		0.78431	0.92693
daf-2;crh-1	0.55172		0.97297	0.373924		neuronal AID	-0.15385		0.85897	0.971663		hypodermal AID	-0.22105		0.90173	1.1656		neuronal AID with crh-1	0.50704		0.97927	0.375188		hypodermal AID with crh-3	-0.092308		0.89005	1.03267
daf-2;crh-1	0.68421		0.83505	0.236004		neuronal AID	-0.10256		0.928	1.04069		hypodermal AID	-0.20168		0.8995	1.16337		neuronal AID with crh-1	0.49064		0.97887	0.374788		hypodermal AID with crh-4	0.15625		0.86538	1.008
daf-2	0.6087	0.608182	0.9916	0.383418
daf-2	0.61111		0.96296	0.354778
daf-2	0.67742		0.98347	0.375288
daf-2	0.5283		0.95276	0.344578
daf-2	0.61538		0.90503	0.296848

## Sheet: Figure 4
Figure 4D
strain	CI at naïve	mean CI of naive	CI at T0	LI at T0
control auxin	0.31507	0.261568	1	0.738432
control auxin	0.27273		0.97959	0.718022
control auxin	0.29545		0.97297	0.711402
control auxin	0.22667		0.90164	0.640072
control auxin	0.19792		0.87952	0.617952
control	-0.038462	-0.17625	0.94521	1.12146
control	-0.1194		0.94872	1.12497
control	-0.095238		0.98182	1.15807
control	-0.39286		0.91	1.08625
control	-0.23529		0.91589	1.09214
osm-11 auxin	0.27586	0.360666	0.95918	0.598514
osm-11 auxin	0.43434		0.92208	0.561414
osm-11 auxin	0.45833		0.96491	0.604244
osm-11 auxin	0.3375		0.97656	0.615894
osm-11 auxin	0.2973		0.95283	0.592164
osm-11	-0.17333	-0.123897	0.94521	1.06911
osm-11	-0.10145		0.91333	1.03723
osm-11	-0.099368		1	1.1239
osm-11	-0.071429		0.94203	1.06593
osm-11	-0.17391		0.97297	1.09687

## Sheet: Figure 5
Figure 5A						Figure 5B						Figure 5C						Figure 5D						Figure 5E						Figure 5E
strain	CI at naïve	mean CI of naive	CI at T0	LI at T0		strain	CI at naïve	mean CI of naive	CI at T0	LI at T0		strain	CI at naïve	mean CI of naive	CI at T0	LI at T0		strain	CI at naïve	mean CI of naive	CI at T0	LI at T0		strain	CI at naïve	mean CI of naive	CI at T0	LI at T0		strain	CI at naïve	mean CI of naive	CI at T0	LI at T0
glp-1 auxin	0.121212	-0.0700207	0.625	0.695021		lin-12 auxin	0.526316	0.577516	0.935484	0.357968		lag-1 auxin	0.41573	0.430906	0.8835	0.452594		sel-8 auxin	0.17568	0.214001	0.96774	0.753739		AIY lin-12 auxin	0.425926	0.415929	0.941176	0.525248		RIG lin-12 auxin	0.0263158	0.142819	0.954545	0.811727
glp-1 auxin	-0.15625		0.577778	0.647799		lin-12 auxin	0.75		1	0.422484		lag-1 auxin	0.31658		0.98089	0.549984		sel-8 auxin	0.14286		0.97619	0.762189		AIY lin-12 auxin	0.363636		0.964706	0.548777		RIG lin-12 auxin	0.0625		1	0.857181
glp-1 auxin	0.0175439		0.227273	0.297293		lin-12 auxin	0.641026		0.984375	0.406859		lag-1 auxin	0.35811		0.97143	0.540524		sel-8 auxin	0.042254		1	0.785999		AIY lin-12 auxin	0.25641		1	0.584071		RIG lin-12 auxin	0		1	0.857181
glp-1 auxin	-0.183673		0.327273	0.397293		lin-12 auxin	0.428571		1	0.422484		lag-1 auxin	0.59211		0.9	0.469094		sel-8 auxin	0.40541		0.96552	0.751519		AIY lin-12 auxin	0.626263		1	0.584071		RIG lin-12 auxin	0.454545		1	0.857181
glp-1 auxin	-0.148936		0.694444	0.764465		lin-12 auxin	0.541667		1	0.422484		lag-1 auxin	0.472		0.98148	0.550574		sel-8 auxin	0.3038		1	0.785999		AIY lin-12 auxin	0.407407		0.961538	0.54561		RIG lin-12 auxin	0.170732		1	0.857181
glp-11 RNAi	-0.116279	-0.0132588	0.546875	0.560134		lin-12 RNAi	-0.189189	-0.264909	0.960784	1.22569		lag-1 RNAi	-0.044776	0.0393618	0.91262	0.873258		sel-8 RNAi	0	-0.114209	0.91111	1.02532		AIY lin-12 RNAi	-0.184211	-0.320177	0.961165	1.28134		RIG lin-12 RNAi	-0.0851064	-0.132251	0.977273	1.10952
glp-11 RNAi	-0.102041		0.492958	0.506217		lin-12 RNAi	0		1	1.26491		lag-1 RNAi	0.018868		0.86765	0.828288		sel-8 RNAi	-0.10638		1	1.11421		AIY lin-12 RNAi	-0.531915		0.956522	1.2767		RIG lin-12 RNAi	-0.113636		1	1.13225
glp-11 RNAi	-0.0724638		0.666667	0.679925		lin-12 RNAi	-0.484848		0.976744	1.24165		lag-1 RNAi	0.042735		0.97468	0.935318		sel-8 RNAi	-0.13235		0.94828	1.06249		AIY lin-12 RNAi	-0.0869565		0.935897	1.25607		RIG lin-12 RNAi	-0.178571		0.990476	1.12273
glp-11 RNAi	0		0.42623	0.439488		lin-12 RNAi	-0.272727		1	1.26491		lag-1 RNAi	0.080808		0.90323	0.863868		sel-8 RNAi	-0.31148		0.95238	1.06659		AIY lin-12 RNAi	-0.428571		0.947368	1.26755		RIG lin-12 RNAi	-0.113208		0.990385	1.12264
glp-11 RNAi	0.22449		0.75	0.763259		lin-12 RNAi	-0.377778		0.924528	1.18944		lag-1 RNAi	0.099174		0.88525	0.845888		sel-8 RNAi	-0.020833		1	1.11421		AIY lin-12 RNAi	-0.369231		0.882353	1.20253		RIG lin-12 RNAi	-0.170732		1	1.13225
control auxin	-0.258621	0.121173	0.7	0.578827		control auxin	0.219178	0.384039	0.918519	0.534479		control auxin	0.098266	-0.071705	0.97826	1.04997		control auxin	-0.11765	0.0028264	0.9697	0.966874		control auxin	0.418182	0.486514	1	0.513486		control auxin	0.192308	0.0598286	0.866667	0.806838
control auxin	-0.0777778		0.360656	0.239482		control auxin	0.541667		0.965217	0.581178		control auxin	0.043902		0.95604	1.02774		control auxin	-0.033333		1	0.997174		control auxin	0.567901		1.07895	0.592433		control auxin	-0.1875		1	0.940171
control auxin	-0.0185185		0.537037	0.415864		control auxin	0.503704		0.96	0.575961		control auxin	0.021277		0.96774	1.03944		control auxin	0.045455		0.9697	0.966874		control auxin	0.5		0.9375	0.450986		control auxin	0.16568		0.868421	0.808592
control auxin	0.294118		0.729412	0.608238		control auxin	0.322314		0.972727	0.588688		control auxin	-0.20253		0.98684	1.05855		control auxin	0		0.96721	0.964384		control auxin	0.507463		1	0.513486		control auxin	-0.0555556		1	0.940171
control auxin	0.666667		0.8125	0.691327		control auxin	0.333333		1	0.615961		control auxin	-0.31944		1	1.0717		control auxin	0.11966		0.98462	0.981794		control auxin	0.439024		1.05263	0.566118		control auxin	0.184211		0.954545	0.894717
control RNAi	0.222222	-0.174082	0.72549	0.899572		control RNAi	0.114286	-0.141265	0.945205	1.08647		control RNAi	-0.18293	-0.114937	0.95808	1.07302		control RNAi	0.072727	0.0768586	0.94792	0.871061		control RNAi	-0.513514	-0.499133	0.906977	1.40611		control RNAi	-0.214286	-0.176887	0.758242	0.935129
control RNAi	-0.0147059		0.8	0.974082		control RNAi	-0.043956		0.97619	1.11746		control RNAi	-0.066176		0.97778	1.09272		control RNAi	0.026316		0.94444	0.867581		control RNAi	-0.526316		0.90625	1.40538		control RNAi	-0.15625		0.8	0.976887
control RNAi	-0.140351		0.678899	0.852981		control RNAi	-0.229508		0.972727	1.11399		control RNAi	-0.15909		0.99091	1.10585		control RNAi	0.23077		0.93443	0.857571		control RNAi	-0.482759		0.933333	1.43247		control RNAi	-0.0740741		0.865979	1.04287
control RNAi	-0.346667		0.63	0.804082		control RNAi	-0.265896		0.98374	1.125		control RNAi	-0.136		0.96739	1.08233		control RNAi	-0.016949		0.88554	0.808681		control RNAi	-0.646154		1	1.49913		control RNAi	-0.21519		0.858156	1.03504
control RNAi	-0.590909		0.717949	0.892031		control RNAi	-0.28125		0.968421	1.10969		control RNAi	-0.030488		0.96317	1.07811		control RNAi	0.071429		0.93846	0.861601		control RNAi	-0.326923		0.8	1.29913		control RNAi	-0.224638		0.888889	1.06578

## Sheet: Figure 6
Figure 6A
strain	CI at naïve	mean CI of naive	CI at T0	LI at T0		strain	CI at naïve	mean CI of naive	CI at T0	LI at T0
Day 8 auxin	0.037037	-0.048611	0.096774	0.145385		Day 6 auxin	-0.090909	0.003621	0.71429	0.710669
Day 8 auxin	0		0.10811	0.156721		Day 6 auxin	0.046875		0.61314	0.609519
Day 8 auxin	-0.25		0.089744	0.138355		Day 6 auxin	-0.013333		0.69655	0.692929
Day 8 auxin	0.018519		0.030303	0.078914		Day 6 auxin	0		0.83636	0.832739
Day 8 control	0.055556	0.0368587	-0.052632	-0.0894907		Day 6 auxin	0.075472		0.77922	0.775599
Day 8 control	0.039216		0	-0.0368588		Day 6 control	0.022901	-0.100164	0.73267	0.832834
Day 8 control	0.016949		0	-0.0368588		Day 6 control	-0.19266		0.66667	0.766834
Day 8 control	0.035714		0.090909	0.0540503		Day 6 control	-0.059524		0.75472	0.854884
						Day 6 control	-0.1791		0.616	0.716164
						Day 6 control	-0.092437		0.64444	0.744604

## Sheet: Supp Figure S1
Fig S1A
strain	CI at naïve	mean CI of naive	CI at T0	LI at T0
muscle AID	0.16129	0.0334534	0.59794	0.564487
muscle AID	-0.075		0.49275	0.459297
muscle AID	0.0625		0.57282	0.539367
muscle AID	0.04878		0.65031	0.616857
muscle AID	-0.030303		0.42788	0.394427
N2	0.19481	0.15119	1	0.84881
N2	0.15152		0.95434	0.80315
N2	0.037209		0.9902	0.83901
N2	0.26776		1	0.84881
N2	0.10465		0.98182	0.83063

## Sheet: Supp Figure S5
Figure S5C
strain	CI at naïve	mean CI of naive	CI at T0	LI at T0
sel-8 auxin	-0.22222	-0.130598	0.86111	0.991708
sel-8 auxin	-0.23077		0.94805	1.07865
sel-8 auxin	-0.2		0.86667	0.997268
sel-8 auxin	0		0.89831	1.02891
sel-8 auxin	0		0.87912	1.00972
sel-8 RNAi	-0.40909	-0.239024	0.89796	1.13698
sel-8 RNAi	-0.18182		0.66667	0.905694
sel-8 RNAi	-0.20225		0.85185	1.09087
sel-8 RNAi	-0.16667		0.59459	0.833614
sel-8 RNAi	-0.23529		0.9	1.13902
control auxin	-0.25	-0.38226	0.70423	1.08649
control auxin	-0.3125		0.36538	0.74764
control auxin	-0.46154		0.74359	1.12585
control auxin	-0.41667		0.7931	1.17536
control auxin	-0.47059		0.68966	1.07192
control RNAi	-0.15152	-0.346158	0.375	0.721158
control RNAi	-0.2963		0.75694	1.1031
control RNAi	-0.25		0.83333	1.17949
control RNAi	-0.46154		0.66129	1.00745
control RNAi	-0.57143		0.69231	1.03847
